# Supplementary material for: A Diphenylalanine Based Pentapeptide with Fibrillating Self-Assembling Properties
Source: MDPI journal article supplement (doi:10.3390/pharmaceutics15020371), 2023-01-21
Supplement: s1 [file s1]

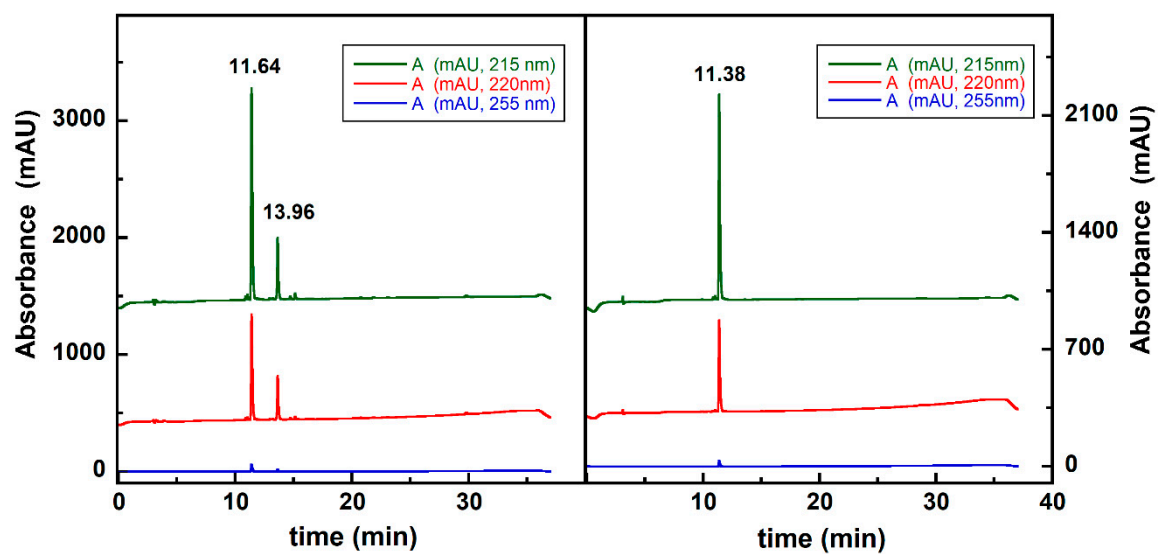

**Figure S1.** Chromatograms of crude and purified FESNF peptide.

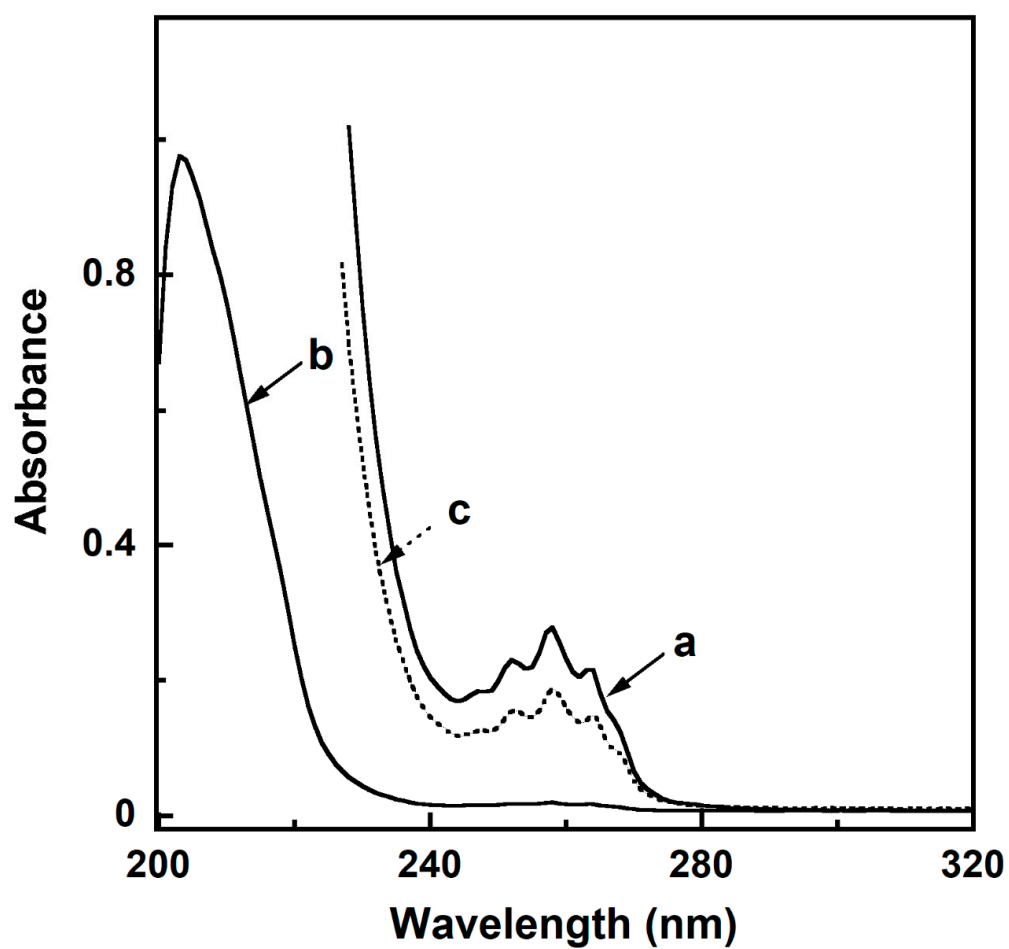

**Figure S2.** UV-Vis spectra of pentapeptide in Tris 30 mM pH 7.3 (a and b, 826  $\mu$ M and 41  $\mu$ M) and acetate 40 mM pH 7.0 (600  $\mu$ M, spectrum c, dotted)

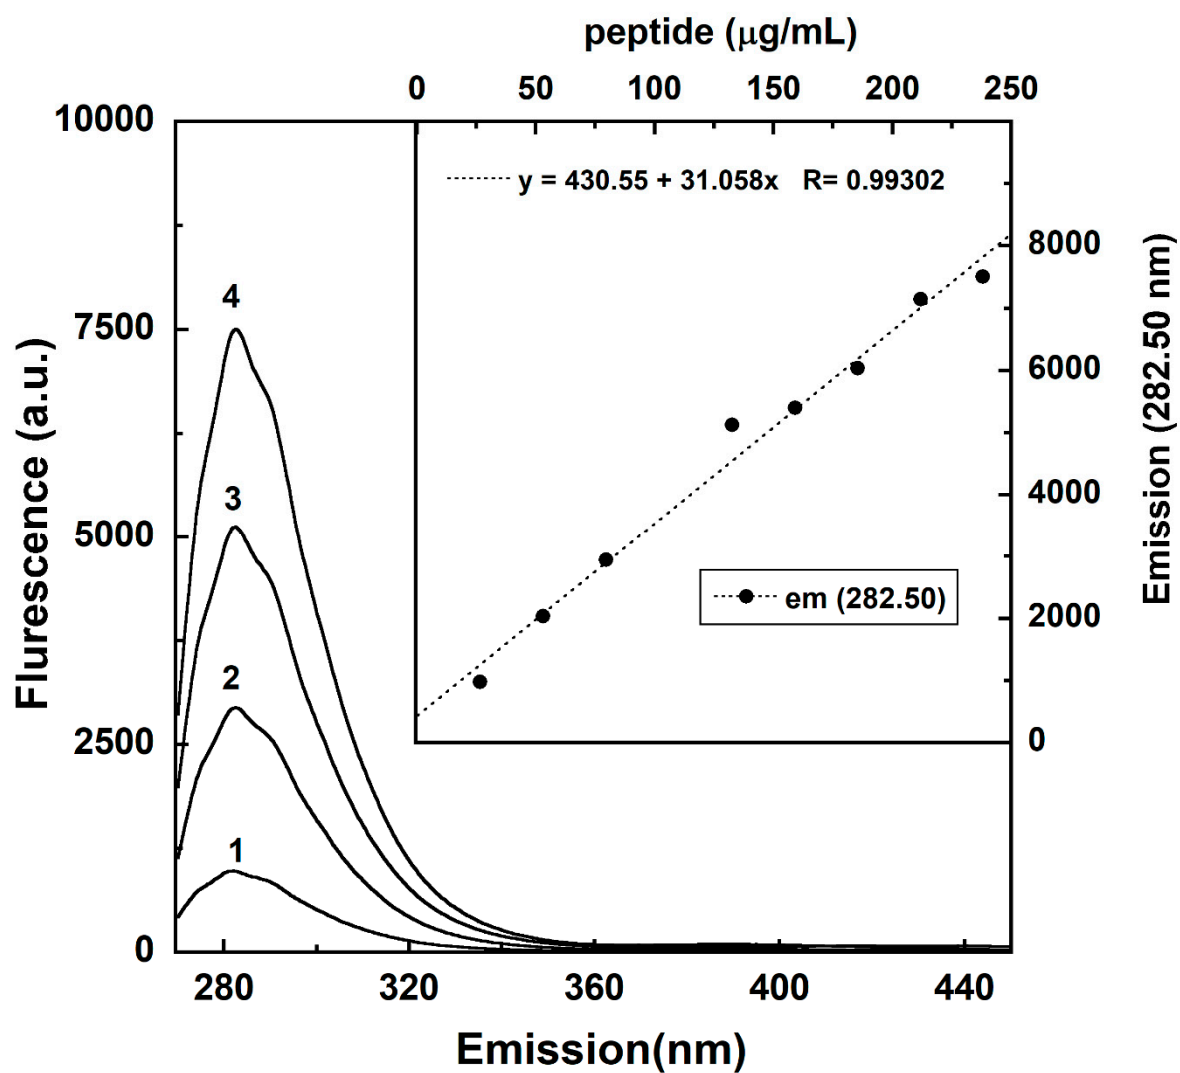

**Figure S3** Emission spectra of pentapeptide (1, 2, 3 and 4 at 26; 80; 132 and 238  $\mu\text{g/mL}$ ) in Tris 30 mM pH 7.3. The inset: fluorescence intensity as function of peptide concentration.

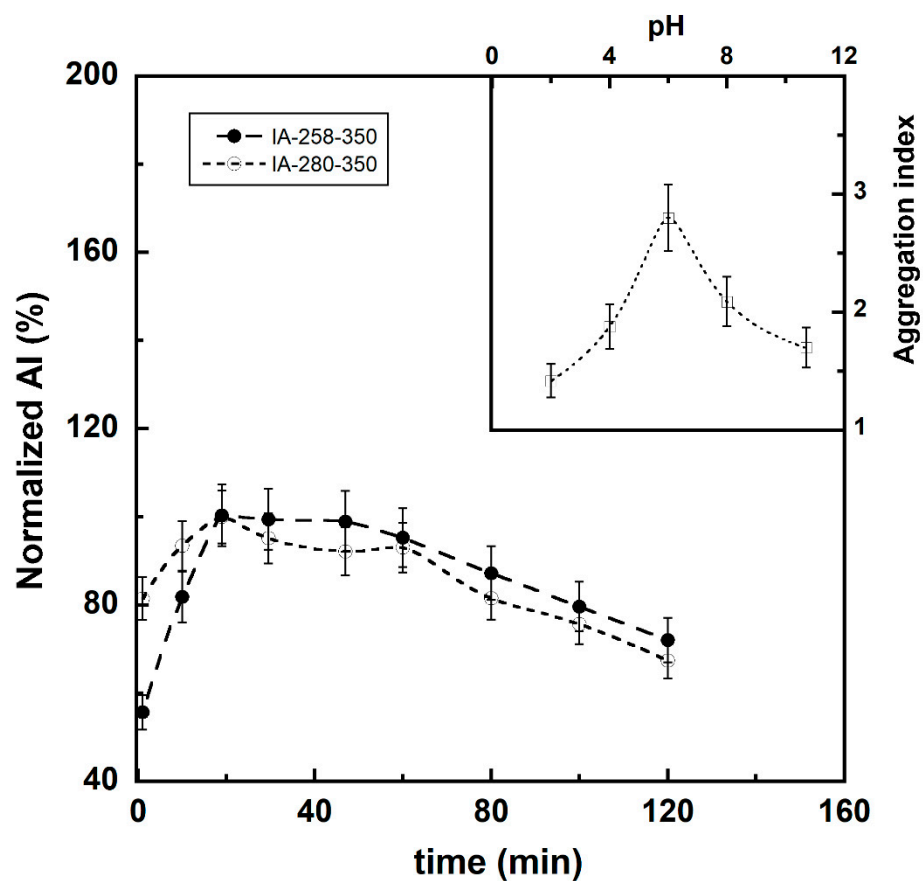

**Figure S4.** Normalized aggregation index (AI) calculated for both 258 nm and 280 nm values. The maximum values for AI were 2.8 (full dots) 44 (empty dots), respectively. *Inset:* aggregation index (AI) variation as function of pH values.

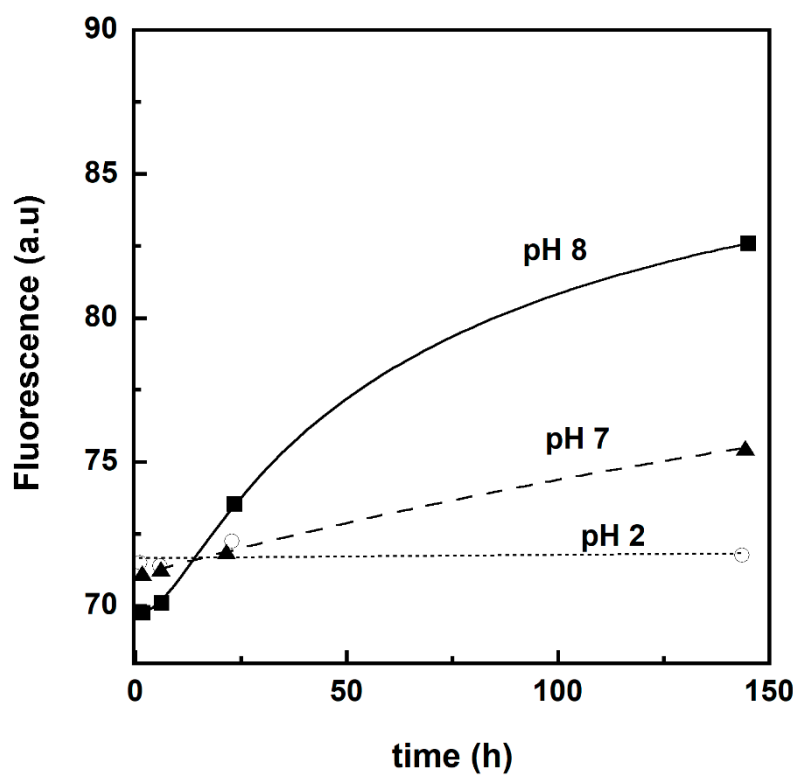

**Figure S5.** Fluorescence emission ( $\lambda_{\text{ex}}$  440 nm and  $\lambda_{\text{em}}$  482 nm) of pentapeptide with 40  $\mu\text{M}$  ThT at pH 8.0 (black squares), pH 7.0 (black triangles) and pH 2.0 (open circles) as a function of incubation time at 50  $^{\circ}\text{C}$ .
